# Supplementary material
Source: PubMed Central journal article supplement (PMC7906721)
Supplement: mmc1.pdf [file mmc1.pdf]

# THE LANCET

## Supplementary appendix

This appendix formed part of the original submission. We post it as supplied by the authors.

Supplement to: Behrens RH, Patel V. Avoiding shoulder injury from intramuscular vaccines. *Lancet* 2021; **397**: 471.

## APPENDIX

**Supplementary figure 1:** Intramuscular site of vaccination as shown in the UK Immunisation against Infectious diseases<sup>1</sup>

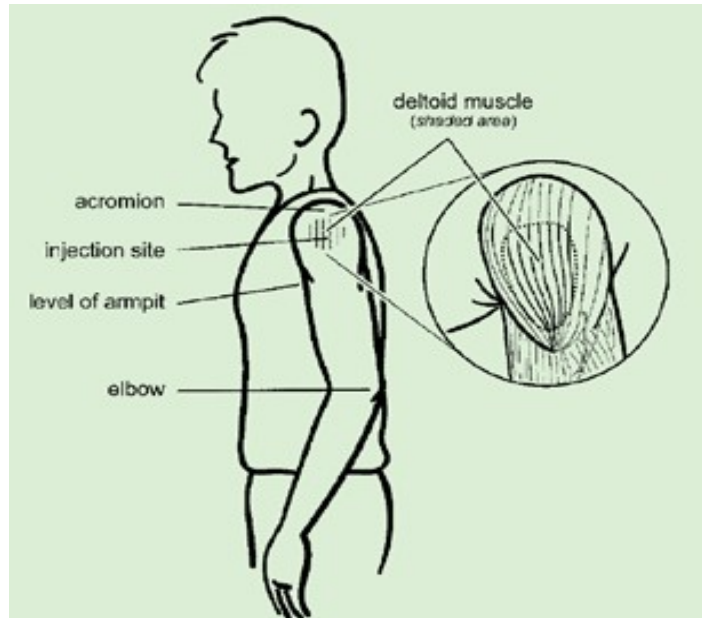

Image licensed under the Creative Commons Attribution 4.0 International licence.

**Supplementary figure 2:** Intramuscular site of vaccination as shown in New Zealand 's Ministry of Health Immunisation Handbook<sup>2</sup>

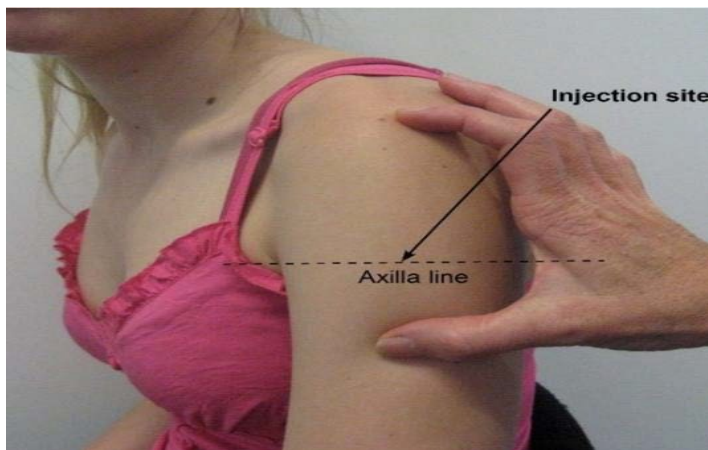

Image licensed under the Creative Commons Attribution 4.0 International licence.

- 1 Public Health England. Immunisation procedures: the green book. March 20, 2013. In: Immunisation against infectious disease. <https://www.gov.uk/government/publications/immunisation-procedures-the-green-book-chapter-4> (accessed Dec 21, 2020).
- 2 New Zealand Ministry of Health. Vaccine administration. In: Immunisation handbook 2020. Wellington: Ministry of Health, 2020: 48–60.
